# Supplementary material for: Mussel-Inspired Anisotropic Nanocellulose and Silver Nanoparticle Composite with Improved Mechanical Properties, Electrical Conductivity and Antibacterial Activity
Source: MDPI journal article supplement (doi:10.3390/polym8030102), 2016-03-22
Supplement: s1 [file s1]

# Supplementary Materials: Mussel-Inspired Anisotropic Nanocellulose and Silver Nanoparticle Composite with Improved Mechanical Properties, Electrical Conductivity and Antibacterial Activity

Hoang-Linh Nguyen, Yun Kee Jo, Minkyu Cha, Yun Jeong Cha, Dong Ki Yoon, Naresh D. Sanandiya, Ekavianty Prajatelista, Dongyeop X Oh and Dong Soo Hwang

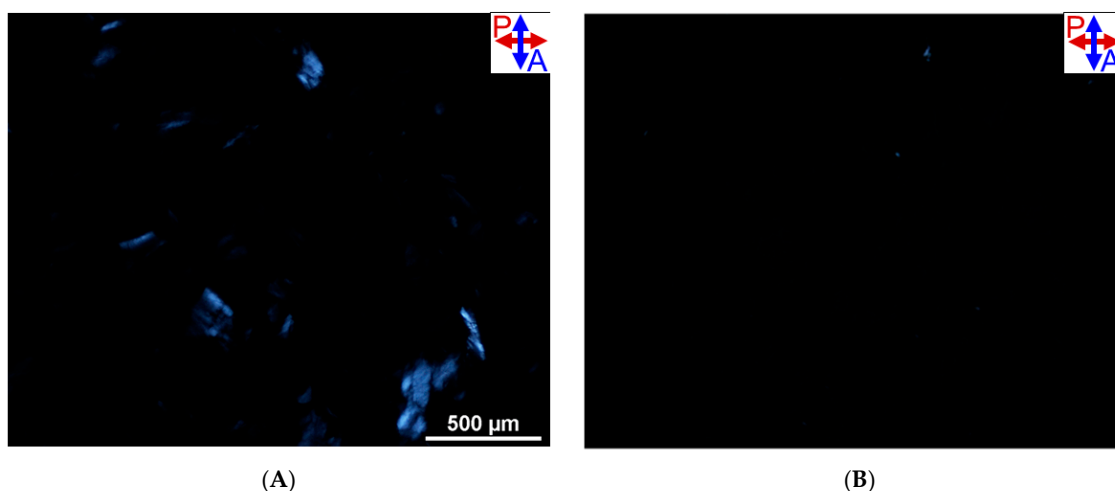

**Figure S1.** POM images of (A) CCNF and (B) CCNF-DA/AgNPs hydrogels. Both images are scaled to the same magnification.

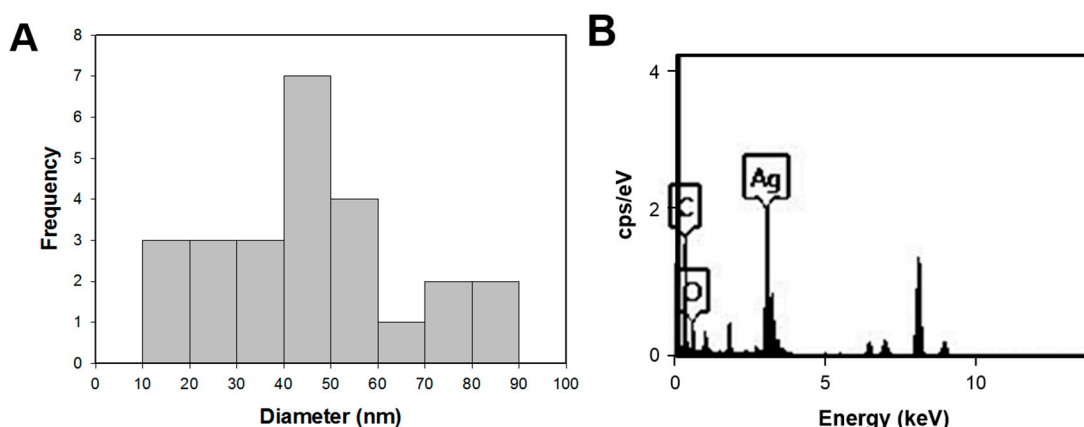

**Figure S2.** (A) Size distribution of AgNPs on CCNF-DA/AgNPs; (B) EDS analysis of the elemental composition of CCNF-DA/AgNPs.

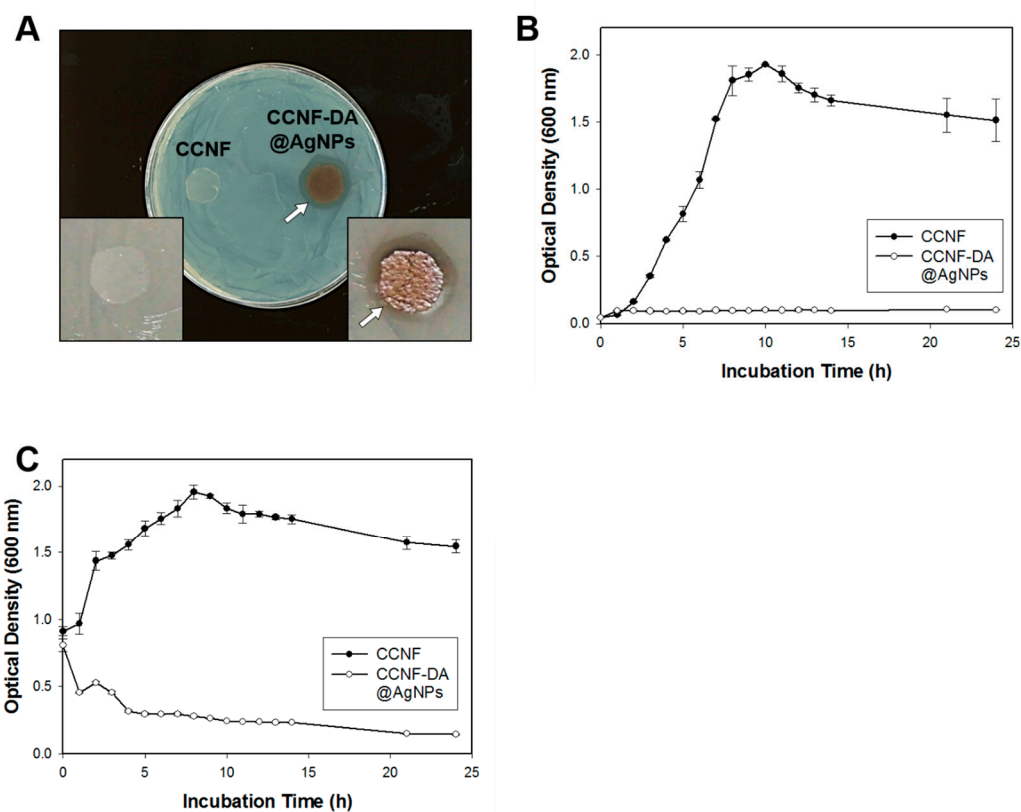

**Figure S3.** Antibacterial test on CCNF-DA/AgNPs membrane. **(A)** Disk diffusion test; **(B)** bacterial growth profiles; and **(C)** bactericidal profiles of the CCNF-DA/AgNPs membrane against *S. aureus*. The data represent mean  $\pm$  standard deviation. The white arrow indicates the inhibition zone.

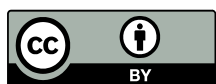

© 2016 by the authors; licensee MDPI, Basel, Switzerland. This article is an open access article distributed under the terms and conditions of the Creative Commons by Attribution (CC-BY) license (<http://creativecommons.org/licenses/by/4.0/>).
